# Supplementary material
Source: PubMed Central journal article supplement (PMC6442961)
Supplement: 2018_205880-Disclosures_and_Contributions.pdf [file 2018_205880-Disclosures_and_Contributions.pdf]

Haematologica  
HAEMATOL/2018/205880  
Version 3

DUSP22-rearranged anaplastic lymphomas are characterized by specific morphological features and a lack of cytotoxic and JAK/STAT surrogate markers

Arantza Onaindia, Sonia González de Villambrosía, Lucía Prieto-Torres, Socorro M. Rodríguez-Pinilla, Santiago Montes-Moreno, Carmen González-Vela, and Miguel A. Piris

Disclosures: This work was supported by grants from the Instituto de Salud Carlos III (ISCIII) of the Spanish Ministry of Economy and Competence (MINECO, RTICC ISCIII and CIBERONC) (SAF2013-47416-R, RD06/0020/0107-RD012/0036/0060 and Plan Nacional I+D+I: PI16/01294 and PIE15/0081), AECC and the Madrid Autonomous Community

Contributions: AO, CGV, SM and MAP performed research. SGV, SMR and LP performed data analysis. AO and MAP wrote the manuscript and MAP supervised the study.
